# Supplementary material for: Self-assembled titanium phosphonate nanomaterial having a mesoscopic void space and its optoelectronic application
Source: Royal Society of Chemistry journal article supplement (doi:10.1039/c3dt32744b), 2013-01-01
Supplement: c3dt32744b.pdf [file c3dt32744b.pdf]

## Supporting Information

### Self-assembled titanium phosphonate nanomaterial having mesoscopic void space and its optoelectronic application

Malay Pramanik, Astam K. Patra and Asim Bhaumik\*

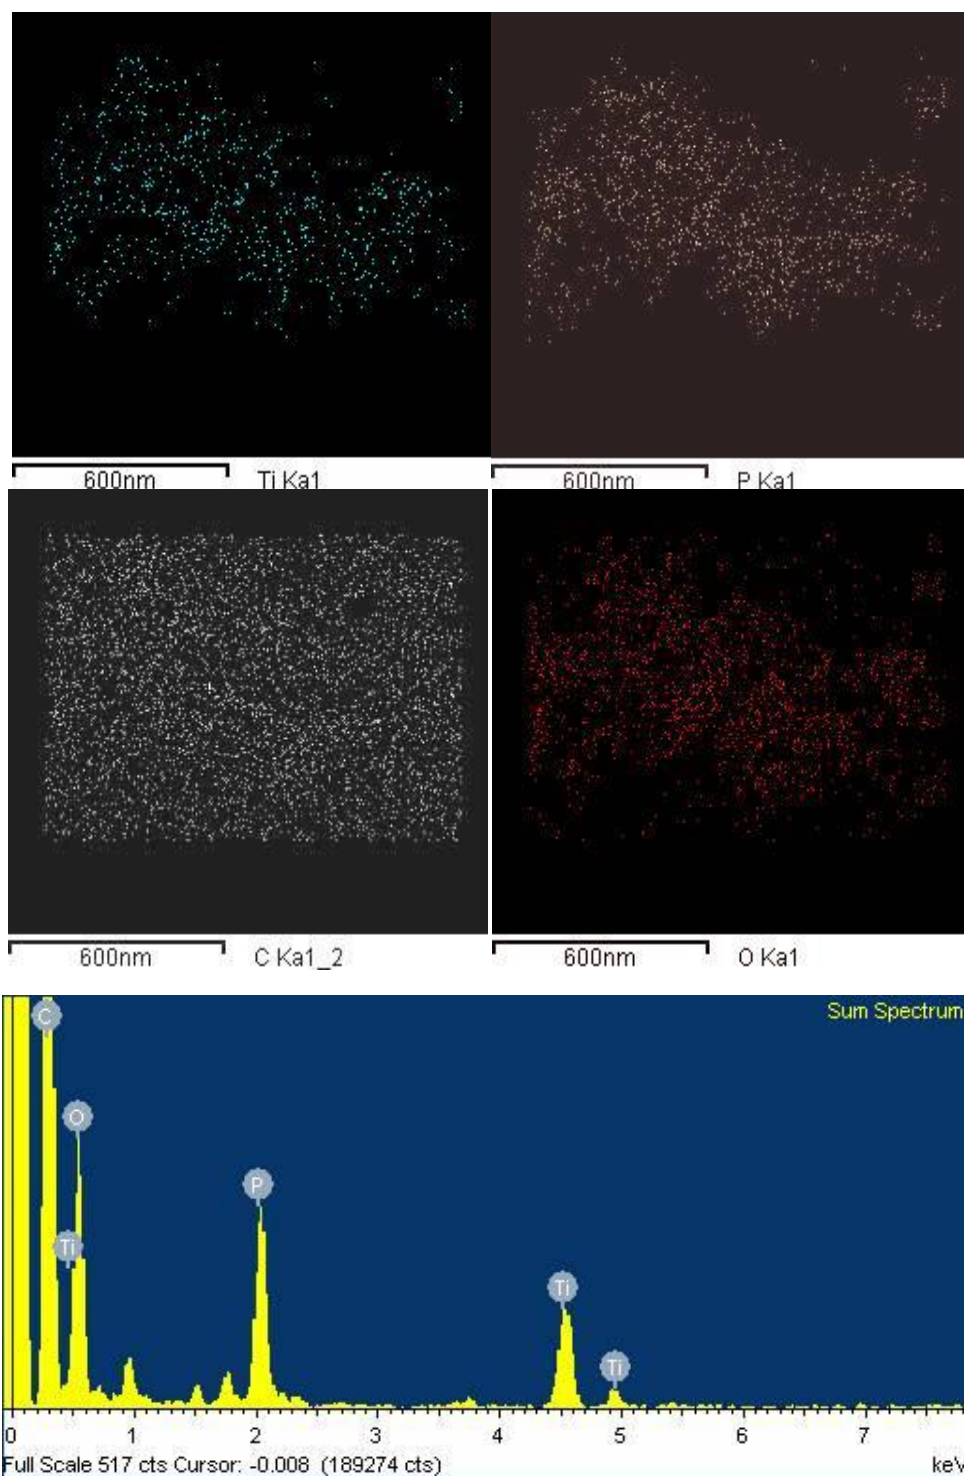

**Figure 1S:** Elemental mapping of the hybrid titanium phosphonate HTiP-7 (up) and EDX analysis (down).

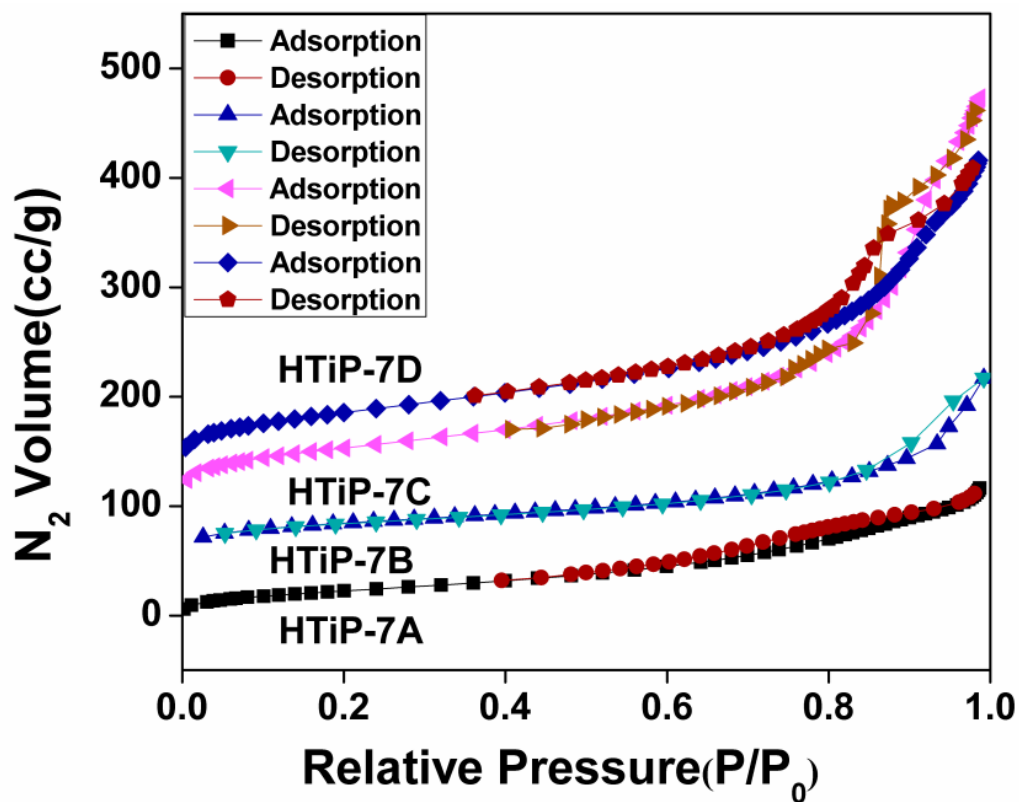

**Figure 2S.** N<sub>2</sub> adsorption and desorption isotherms for HTiP-7A, HTiP-7B, HTiP-7C and HTiP-7D at 77 K. The Y axes of HTiP-7B, HTiP-7C & HTiP-7D have been enhanced by 50, 100 and 125 for clarity.

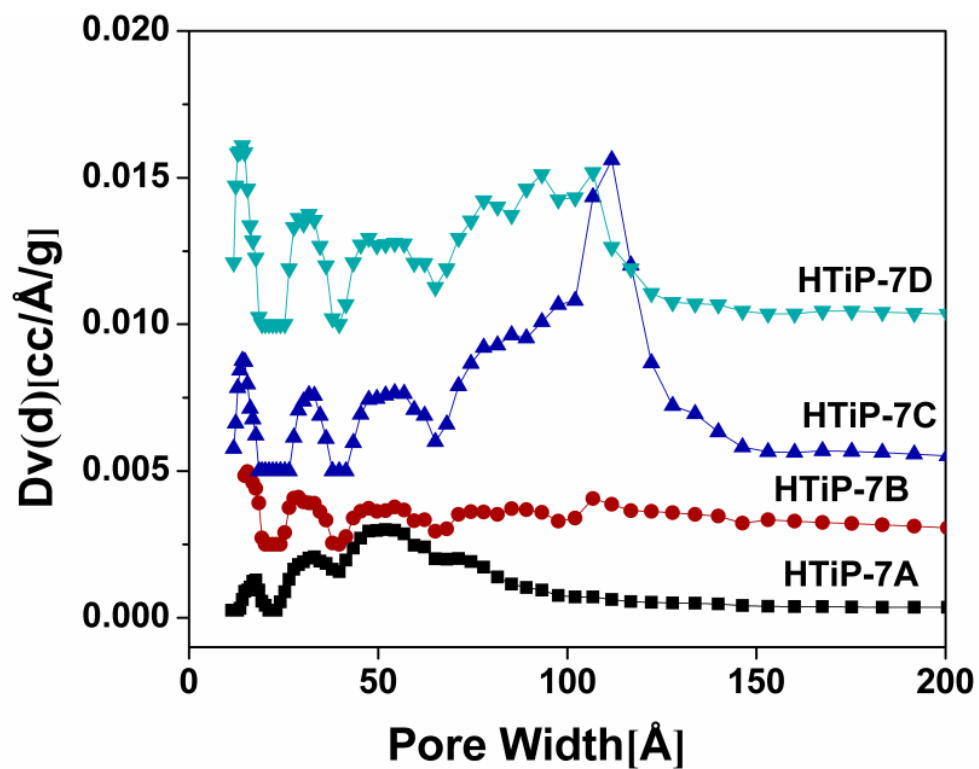

**Figure 3S:** NLDFT pore size distributions obtained from the N<sub>2</sub> adsorption-desorption isotherms of different titanium phosphonate samples: HTiP-7A, HTiP-7B, HTiP-7C and HTiP-7D.
